# Supplementary material for: Easy access to diastereomerically pure platinacycles
Source: Royal Society of Chemistry journal article supplement (doi:10.1039/b315157c), 2004-01-01
Supplement: b315157c.doc [file b315157c.doc]

**Easy Access to Diastereomerically Pure Platinacycles**

Concepción López, *a** Amparo Caubet,*a* Sonia Pérez, *a* Xavier. Solans, *b* Mercè Font-Bardía *b*

*aDepartament de Quimica Inorgànica. Facultat de Quimica. Universitat de Barcelona. Martí i Franquès 1-11. 08028-Barcelona. SPAIN.E-mail: conchi.lopez@qi.ub.es*

*bDepartament de Cristal.lografia, Mineralogia i Dipòsits Minerals. Facultat de Geologia. Martí i Franquès s/n. 08028. Barcelona. SPAIN.*

**SUPPORTING INFORMATION**

**EXPERIMENTAL**

**Materials and methods**

*Cis*-[PtCl2(dmso)2] was prepared as described before.1 The ligands **1a** and **1b** were synthesised using the general procedure described for related ferrocenylketimines of general formulae: [(5-C5H5)Fe{(5-C5H3)-CH=N-R] 2 and further details concerning the experimental part will be published elsewhere. All the solvents used in this work were dried and distilled before use. Elemental analyses (C,H,N and S) were carried out at the *Servei de Recursos Cientifics i Tècnics* (Universitat Rovira i Virgili, Tarragona). Infrared spectra were obtained with a Niccolet Impact 400 instrument using KBr disks. Proton and the two dimensional NMR experiments [1H-1H] COSY and NOESY and the [1H-13C] heteronuclear correlations (HSQC and HMBC) were recorded with a Bruker Advance-DMX 500 or a Varian VRX-500 instruments at 20 °C and using CDCl3 (99.9%) as solvent and SiMe4 as internal standard. Mass spectra , FAB+ were obtained with a VG-Quatro-Fissions intrument using 3-nitrobenzylalcohol (NBA) as matrix..195 Pt {1H}NMR of the complexes was obtained with a Bruker 250 MHz intrument using CDCl3 as solvent, and H2[PtCl6] as external reference [ 195Pt = 0.0 ppm]. The Rf values were determined using silica gel plates (SDS, 60/15m).

**General method for the preparation of [Pt{[(5-C5H3)-CH=N-CH(R3)-CH2OH]Fe(5-C5H5)}Cl(dmso)] {R3 = Me or CHMe2 (2,3)}.** *Cis*-[PtCl2(dmso)2] (250 mg, 5.910-4 mol) and the equimolar amount (5.910-4 mol) of the corresponding ligands (**1a** or **1b**) were dissolved in toluene (20 mL). Then a solution formed by 97 mg of sodium acetate (1.0110-3 mol) and 5mL of methanol (HPLC grade) was added. The resulting reaction mixture was protected from the light with aluminium foil and then refluxed for three days. During this period the formation of a metallic mirror on the walls of the flask was detected. The final solution was filtered out and the filtrate was concentrated to dryness on a rotary evaporator. The residue was then treated with 10 mL of CH2Cl2. The undissolved materials were removed by filtration and discarded and the filtrate was passed through a short SiO2 column chromatography. Fast elution with CH2Cl2 produced the release of an orange band which lead after concentration to dryness, ferrocenecarboxaldehyde (*ca.* 15 mg). Once this band was collected a CH2Cl2:MeOH (100:0.3) mixture was used as eluant. The wine-purple band collected was concentrated giving a violet solid, which according to its 1H-NMR spectrum, contained a 1:1 mixture of the two diastereomers of [Pt{[(5-C5H3)-CH=N-CH(R3)-CH2OH]Fe(5-C5H5)}Cl(dmso)] with R3 = Me: (*Rp,SC*) (**2a**) and (*Rp,SC*) (**3a**) or R3 = CHMe2: (*Sp,SC*) (**2b**) and (*Sp,SC*) (**3b**). Yields: 89 mg (**2a** and **3a**) and 84 mg (**2b** and **3b**). *Characterisation data for* [Pt{[(5-C5H3)-CH=N-CH(Me)-CH2OH]Fe(5-C5H5)}Cl(dmso)]: Anal. (%) Calc. for: C16H22ClFeNO2PtS (found): C, 33.20 (33.44); H, 3.83 (4.03); N, 2.42 (2.40) and S, 5.54 (5.11). MS (FAB+): *m/z* = 579[M] + and 543[M-Cl] +. For [Pt{[(5-C5H3)-CH=N-CH(CHMe2)-CH2OH]Fe(5-C5H5)}Cl(dmso)]: Anal. (%) Calc. for: C18H26ClFeNO2PtS (found): C, 35.63 (36.08); H, 4.32 (4.74); N, 2.31 (2.31) and S, 5.28 (5.17). MS (FAB+): *m/z* = 606 [M]+ and 571[M-Cl]+.

**Separation of the diastereomers of [Pt{[(5-C5H3)-CH=N-CH(R3)-CH2OH]Fe(5-C5H5)}Cl(dmso)] [with R3 = Me: (*Rp,SC*) (2a) and (*Sp,SC*) (3a) or R3 = CHMe2: (*Rp,SC*) (2b) and (*Sp,SC*) (3b)].** For R3 = Me: A 160 mg of the equimolar mixture of the two isomers **2a** and **3a** was dissolved in the minimum amount of CH2Cl2 and passed through a SiO2 column chromatography using a CH2Cl2: MeOH (100:0.02) mixture as eluant. The purple band released was collected in *ca.* 50 mL portions up to a total volume of *ca.* 200mL. These solutions were concentrated to dryness on a rotary evaporator giving a solid which was identified as the (*Rp,SC*)isomer (**2a**). The solution obtained after the subsequent elution with *ca.* 400 mL lead, after work up, to a purple material containing mixtures of the two diastereomers, while the final fractions collected (*ca.* 250mL) allowed to isolate the (*Sp,SC*) diastereomer (**3a)**. Yields: 50 mg (**2a**) and 43mg (**3a**). The two diastereomers of [Pt{[(5-C5H3)-CH=N-CH(CHMe2)-CH2OH]Fe(5-C5H5)}Cl(dmso)]2 were isolated using the same procedure but using 125 mg amount of the crude material and the yields were: 20mg (**2b**) and 34mg(**3b**). *Characterisation data for* ***2a***: 1H-NMR data (500 MHz) = 8.20[s, 1H, -CH=N-, 3J(Pt-H)= 110Hz], 4.28[s, 5H, C5H5], 4.50[dd, 1H, J = 2.6 and J = 1.0Hz, H3], 4.58[t, 1H, J = 2.7, H4], 5.22[dd, 1H, J = 2.5, J = 1.0 Hz, H5], 4.73-4.82[br.m, 1H, H6], 3.89-3.95 and 3.73-3.82 [br.m, 2H, H7], 2.01[br.m, 1H, -OH], 1.29[d, 3H, J = 8.5, Me], 3.54 [s, 3H, 3J(Pt-H)= 31Hz, Me(dmso)] and 3.59[s, 3H, 3J(Pt-H)= 28Hz, Me(dmso)] ppm. 13C{1H}-NMR data (100.78 Hz): = 174.7[-CH=N-, J (Pt-C) = 60.2], 70.5[C5H5], 86.5[C1], 86.1[C2], 71.7[C3], 68.1[C4], 76.4[C5], 59.7[C6], 66.4[C7], 16.6[Me], 47.0 and 47.1[Me(dmso)] ppm. 195Pt{1H}NMR:  = -3824 ppm. IR (KBr pellets): (-CH=N-) = 1578 cm-1. *Rf* [CH2Cl2:MeOH (100:0.1)] = 0.096. *For* ***3a***: 1H-NMR data (500 MHz) = 8.21[s, 1H, -CH=N-, 3J(Pt-H)= 109], 4.25[s, 5H, C5H5], 4.55[dd, 1H, J = 2.5 and J = 1.0 Hz, H3], 4.75[t, 1H, J = 2.5, H4], 5.20[dd, 1H, J = 2.5, J = 1.0 Hz, H5], 4.62-4.74[br.m, 1H, H6], 3.70-3.82[br.m, 2H, H7], 1.83[br.m, 1H, -OH], 1.44[d, 3H, J = 6.5, Me], 3.58 [s, 3H, 3J(Pt-H)= 21Hz, Me(dmso)] and 3.54[s, 3H, 3J(Pt-H)= 23Hz, Me(dmso)] ppm. 13C{1H}-NMR data (100.78 Hz): = 174.9[-CH=N-], 70.3[C5H5], 86.3[C1], 85.7[C2], 68.2[C3], 71.6[C4], 76.4[C5], 60.32[C6], 65.3[C7], 17.06[Me], 46.97[Me(dmso)] ppm. 195Pt{1H}NMR:  = -3814 ppm IR (KBr pellets): (-CH=N-) = 1576 cm-1. *Rf* [CH2Cl2:MeOH (100:0.1)] = 0.021. *For* ***2b***: 1H-NMR data (500 MHz) = 8.21[s, 1H, -CH=N-, 3J(Pt-H)= 107], 4.37[s, 5H, C5H5], 4.60[s, H3], 4.68[br, 2H, H4 and H6], 5.31[s, 1H, J = H5], 3.84-3.90 and 3.95-4.01-3.82 [br.m, 2H, H7], 2.20[br.m, 1H, -OH], 1.66 [br., 1H, H8], 0.99[d, 3H, J = 6.5, Me], 0.95[d, 3H, J = 6.5, Me] and 3.54 [s, 6H, Me(dmso)] ppm. 13C{1H}-NMR data (100.78 Hz): = 176.4[-CH=N-], 70.0[C5H5], 86.3[C1], 86.1[C2], 67.8[C3], 68.1[C4], 71.2[C5], 76.1[C6], 75.3[C7], 28.3[C8], 19.5 and 19.9[Me] and 46.8[Me(dmso)] ppm. 195Pt{1H}NMR:  = -3826 ppm. IR (KBr pellets): (-CH=N-) = 1575 cm-1. *Rf* [CH2Cl2:MeOH (100:0.2)] = 0.083. *For* ***3b***: 1H-NMR data (500 MHz) = 8.21[s, 1H, -CH=N-, 3J(Pt-H)= 115], 4.29[s, 5H, C5H5], 4.51[s, 1H, H3], 4.57[br., 2H, J = 2.5, H4and H6], 5.22[s, 1H, H5], 4.62-4.74[br.m, 1H, H6], 3.70-3.82 and 3.90-4.1[br.m, 2H, H7], 2.40[br.m, 1H, -OH], 1.08 [d, 6H, Me], 3.59 [s, 3H, 3J(Pt-H)= 21Hz, Me(dmso)] and 3.55[s, 3H, 3J(Pt-H)= 23Hz, Me(dmso)] ppm. 13C{1H}-NMR data (100.78 Hz): = 176.8[-CH=N-], 70.3[C5H5], 86.7[C1], 85.8[C2], 67.8[C3], 71.2[C4], 75.9[C5], 75.3[C6], 67.3[C7], 28.2 [C8],19.5 and 20.2[Me], 46.97[Me(dmso)] ppm. 195Pt{1H}NMR:  = -3825 ppm IR (KBr pellets): (-CH=N-) = 1571 cm-1. *Rf* [CH2Cl2:MeOH (100:0.2) = 0.033.

**References**

[1] J.M. Price, A.N. Williamson, R.F. Schramm and B.B. Wayland, *Inorg. Chem.* 1972, **11**, 1280.

[2] R. Bosque, C. López, J. Sales and X. Solans, *J. Chem. Doc., Dalton Trans*. 1994, 735.
